# Supplementary material
Source: PubMed Central journal article supplement (PMC3482860)
Supplement: supp_blood-2012-02-414060_blood-2012-02-414060-1.pdf [file supp_blood-2012-02-414060_blood-2012-02-414060-1.pdf]

## Supplemental Figure 1

### A %Bim Response by Cytogenetics

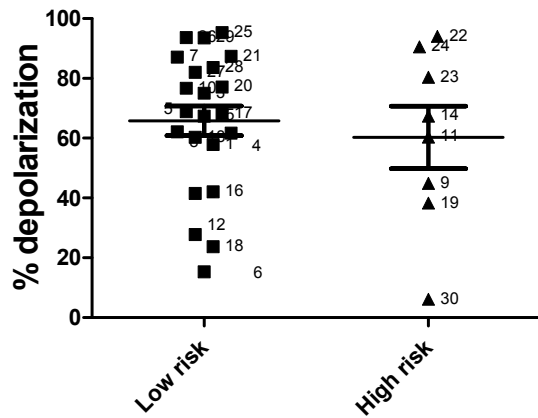

|                   |        |
|-------------------|--------|
| Mann Whitney test |        |
| P value           | 0.7075 |

### B %Bim Response by ZAP-70 Status

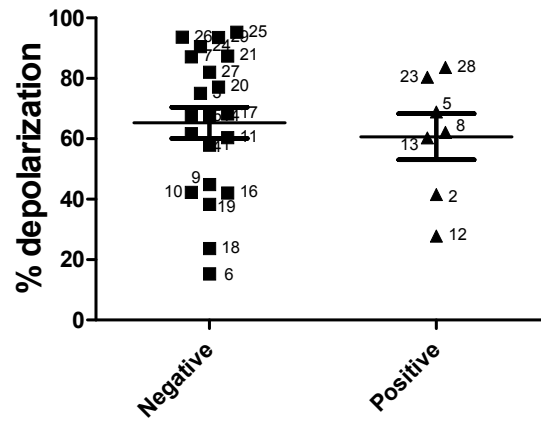

|                   |        |
|-------------------|--------|
| Mann Whitney test |        |
| P value           | 0.5594 |

### C %Bim Response in Early vs. Advanced Stage

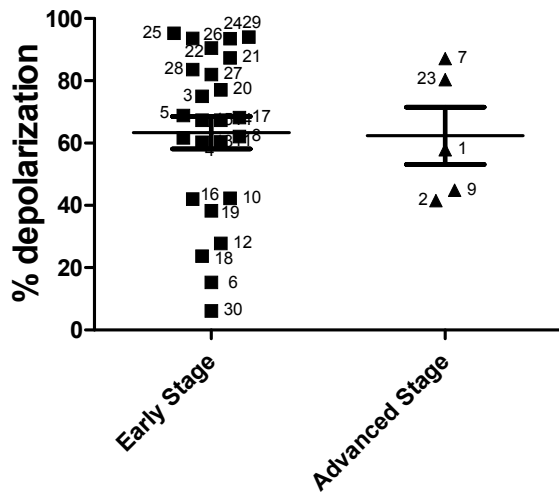

|                   |        |
|-------------------|--------|
| Mann Whitney test |        |
| P value           | 0.6968 |

**Clinical characteristics not associated with priming.** Mitochondrial priming, as assessed by BH3 profiling with BIM BH3 peptide at 0.03 uM was not found to be different when comparing: (A) low risk [del(13p), trisomy 12, or normal] vs. high risk [del(17p), del(11q), complex] cytogenetics, (B) negative vs. positive ZAP-70 status (20% threshold for positive), or (C) early (Rai stages 0-2) vs. advanced (Rai stages 3 & 4) disease

Supplemental Figure 2

A

# CD154+ L cell stroma

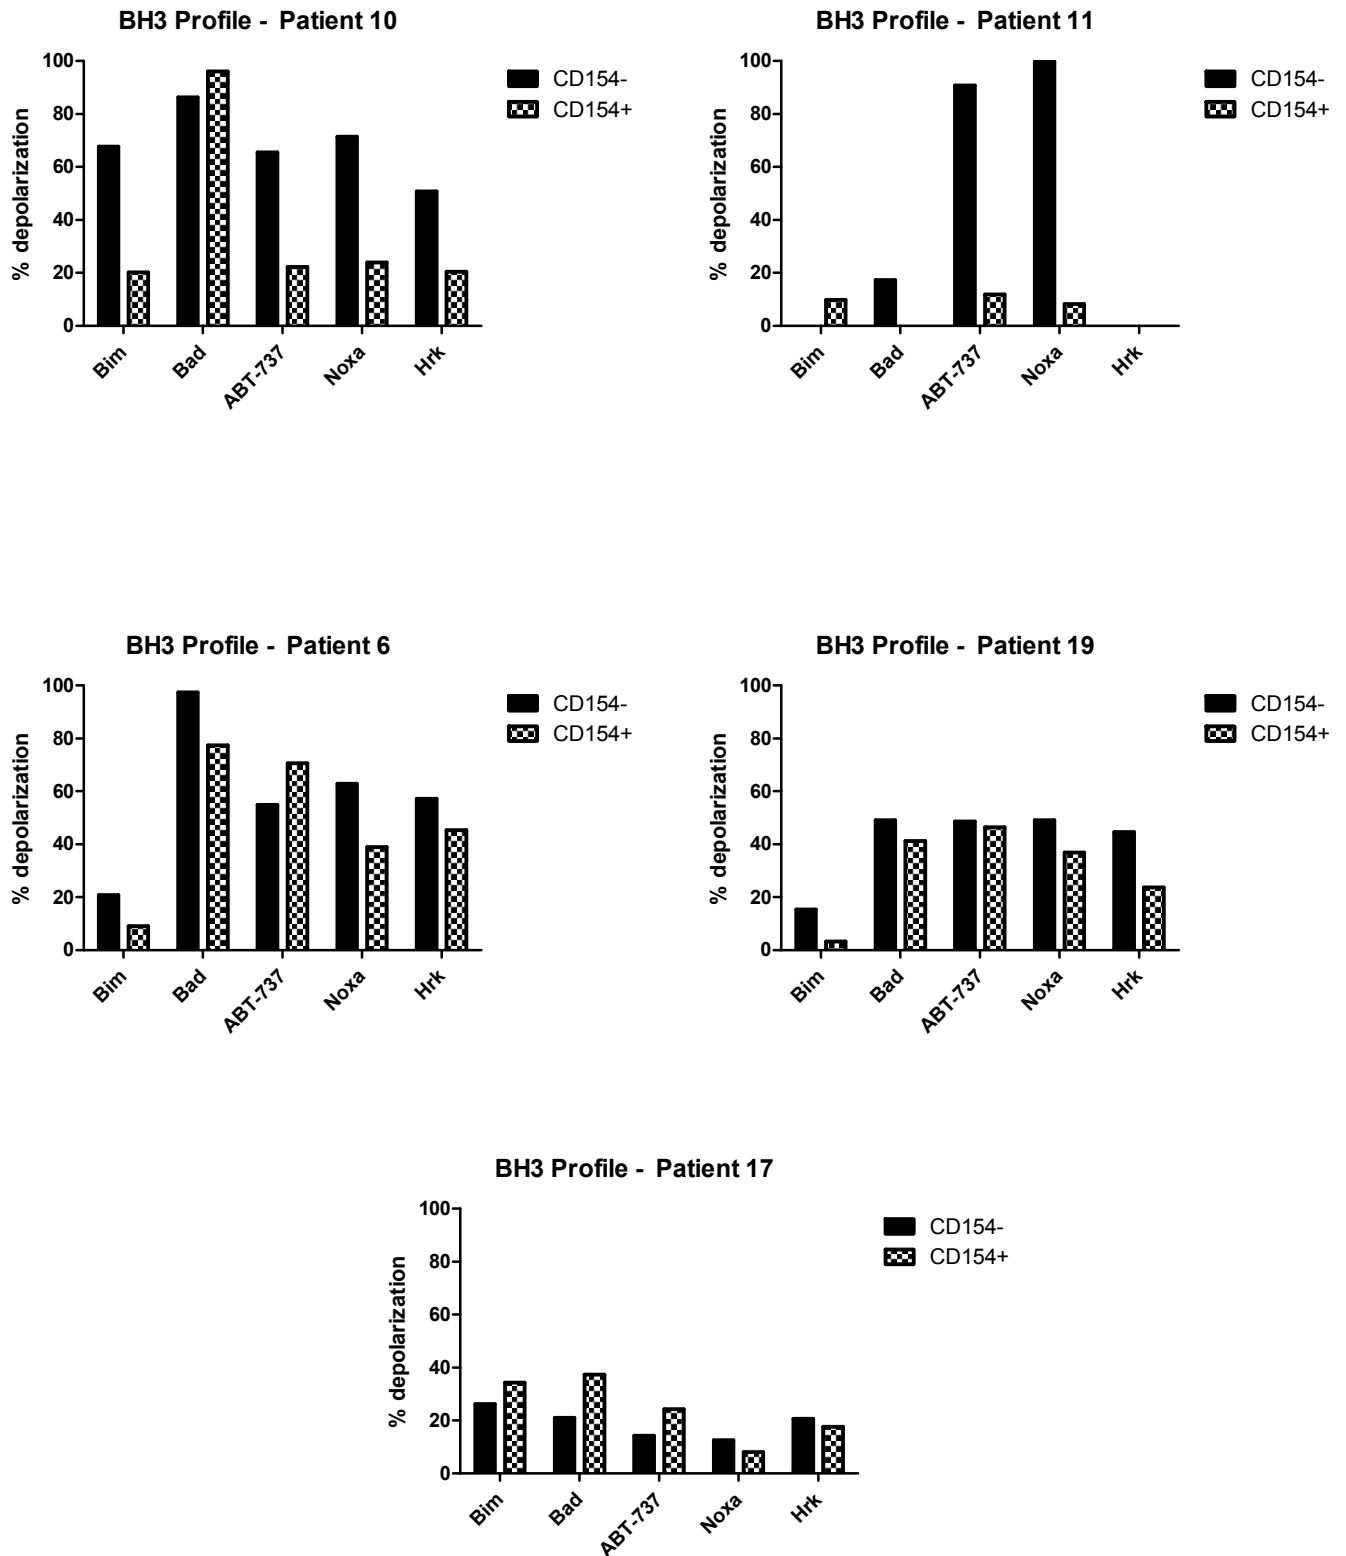

Supplemental Figure 2

**B**

**StromaNKTert stroma**

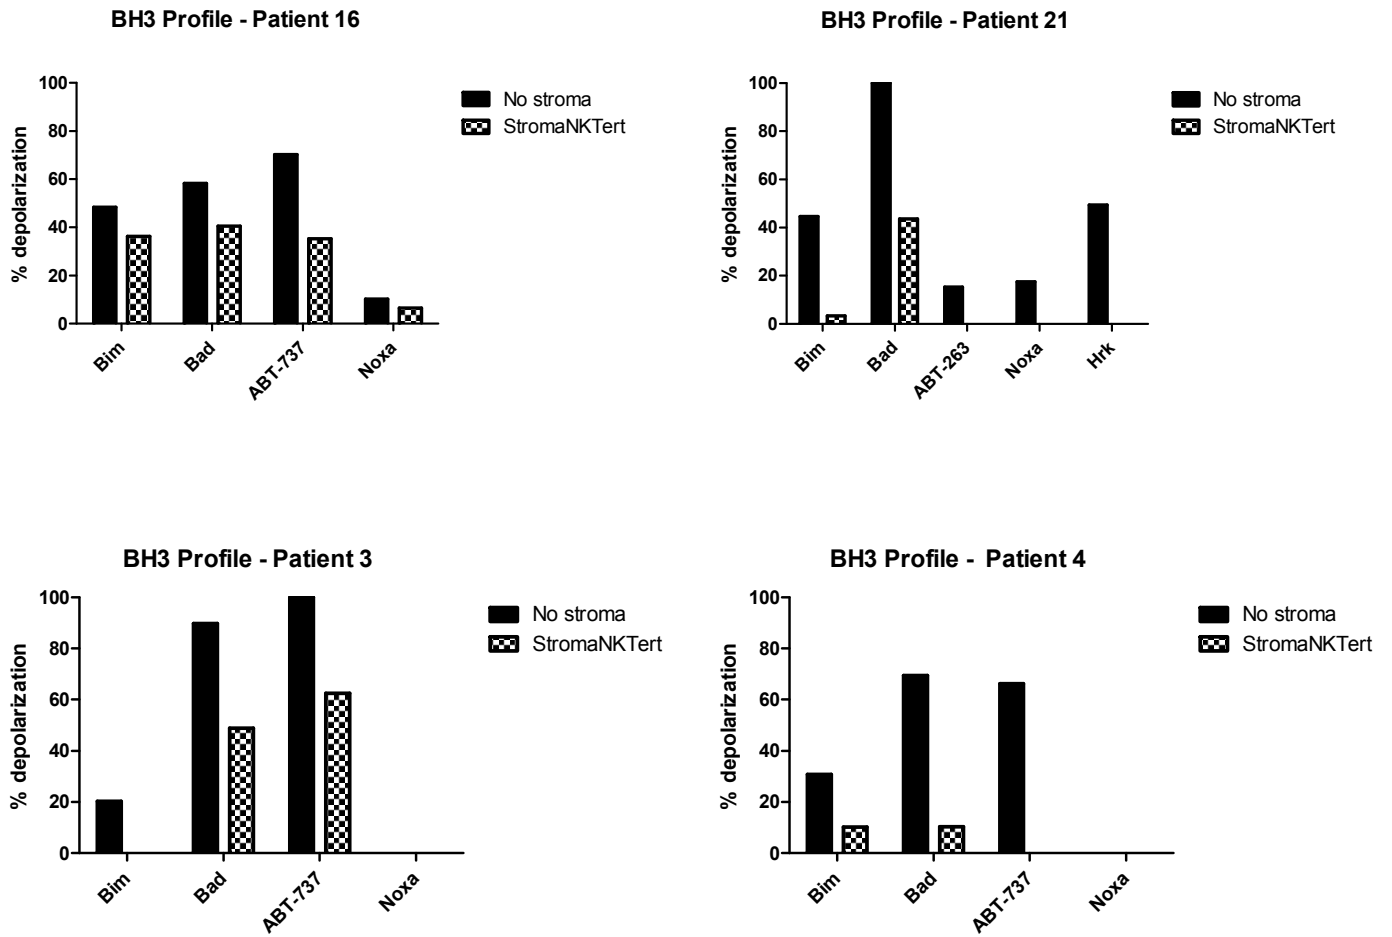

Supplemental Figure 2

C

### NLC stroma

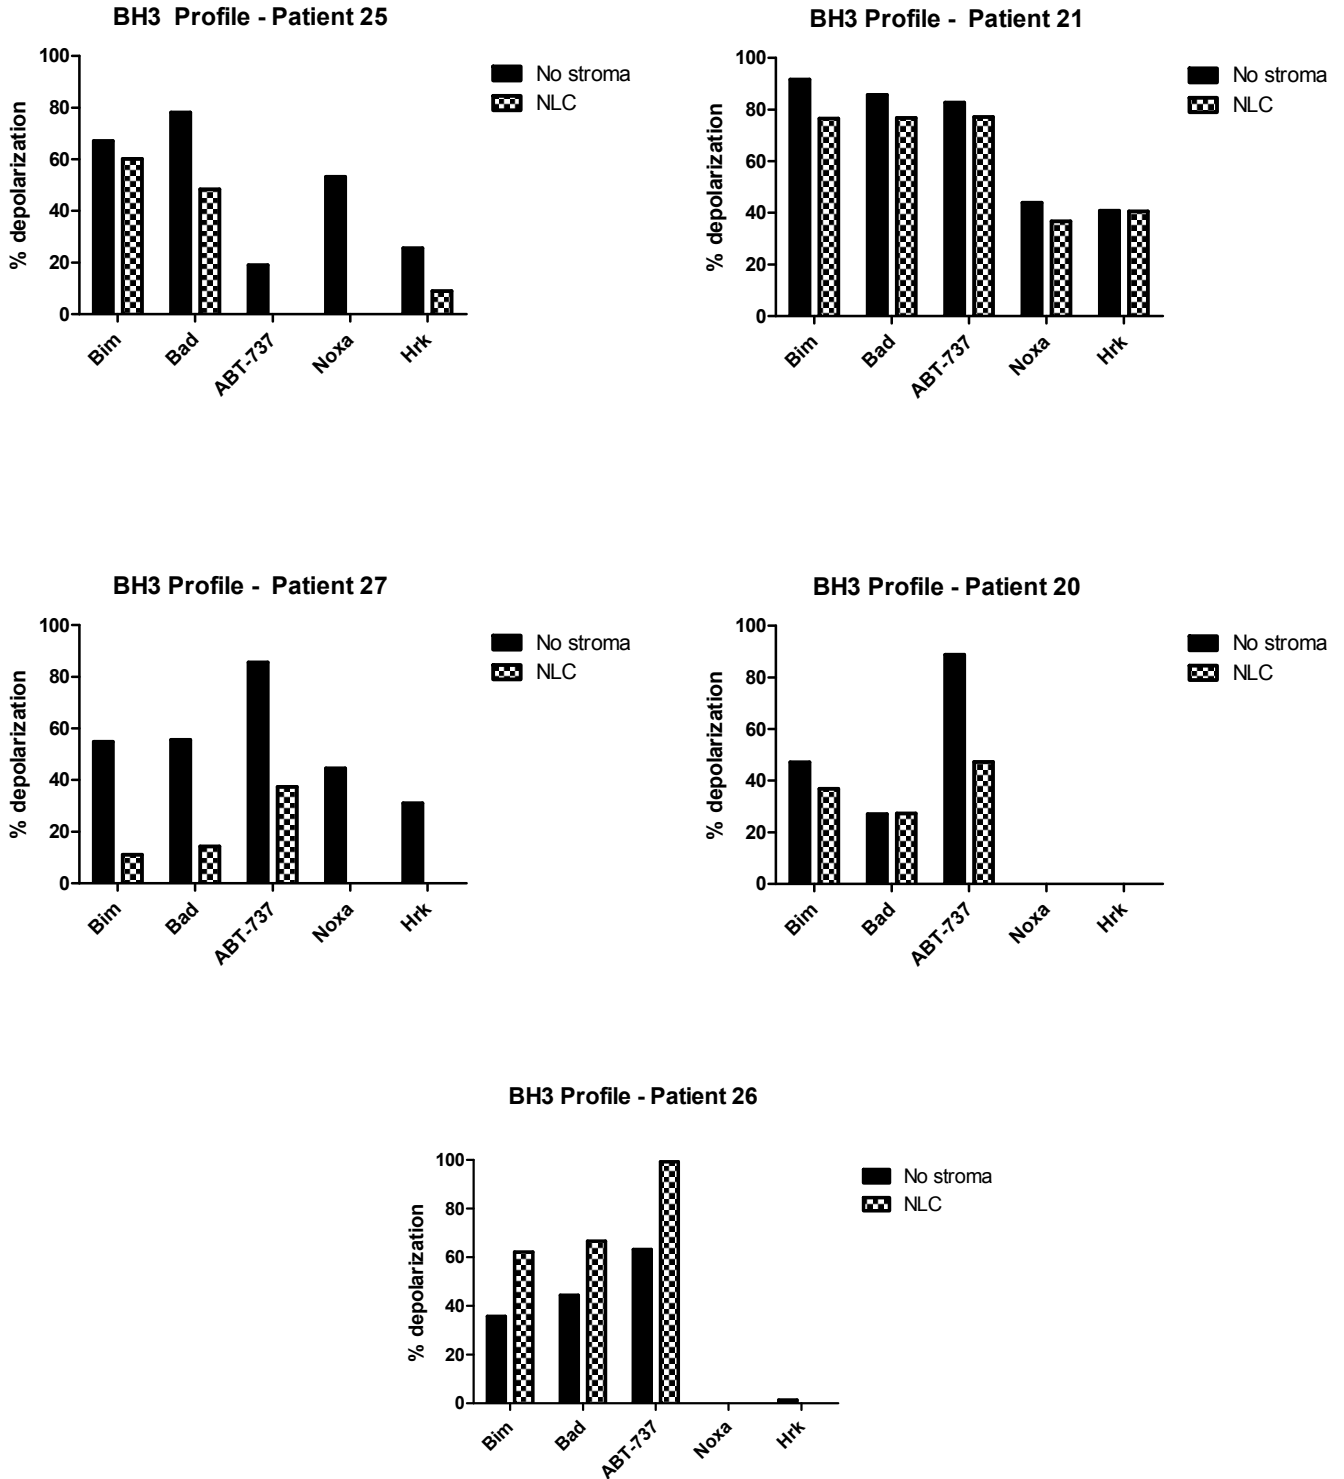

## Supplemental Figure 2

***In vitro*, BH3 profiling demonstrates that primary CLL cells co-cultured for 24 hrs. with a variety of stroma are less primed to undergo apoptosis.** (A-C) Complete BH3 profiling data from individual patients whose CLL cells were co-cultured with (A) CD154+ L cell (n=5), (B), StromaNKTert (n=4), or (C) primary human NLC (n=5) stroma demonstrate that CLL cells cultured in these simulated CLL stromal microenvironments consistently exhibit decreased mitochondrial priming compared to CLL cells cultured in the absence of stroma. Absent bars for a given peptide indicate no depolarization was observed.

Supplemental Figure 3

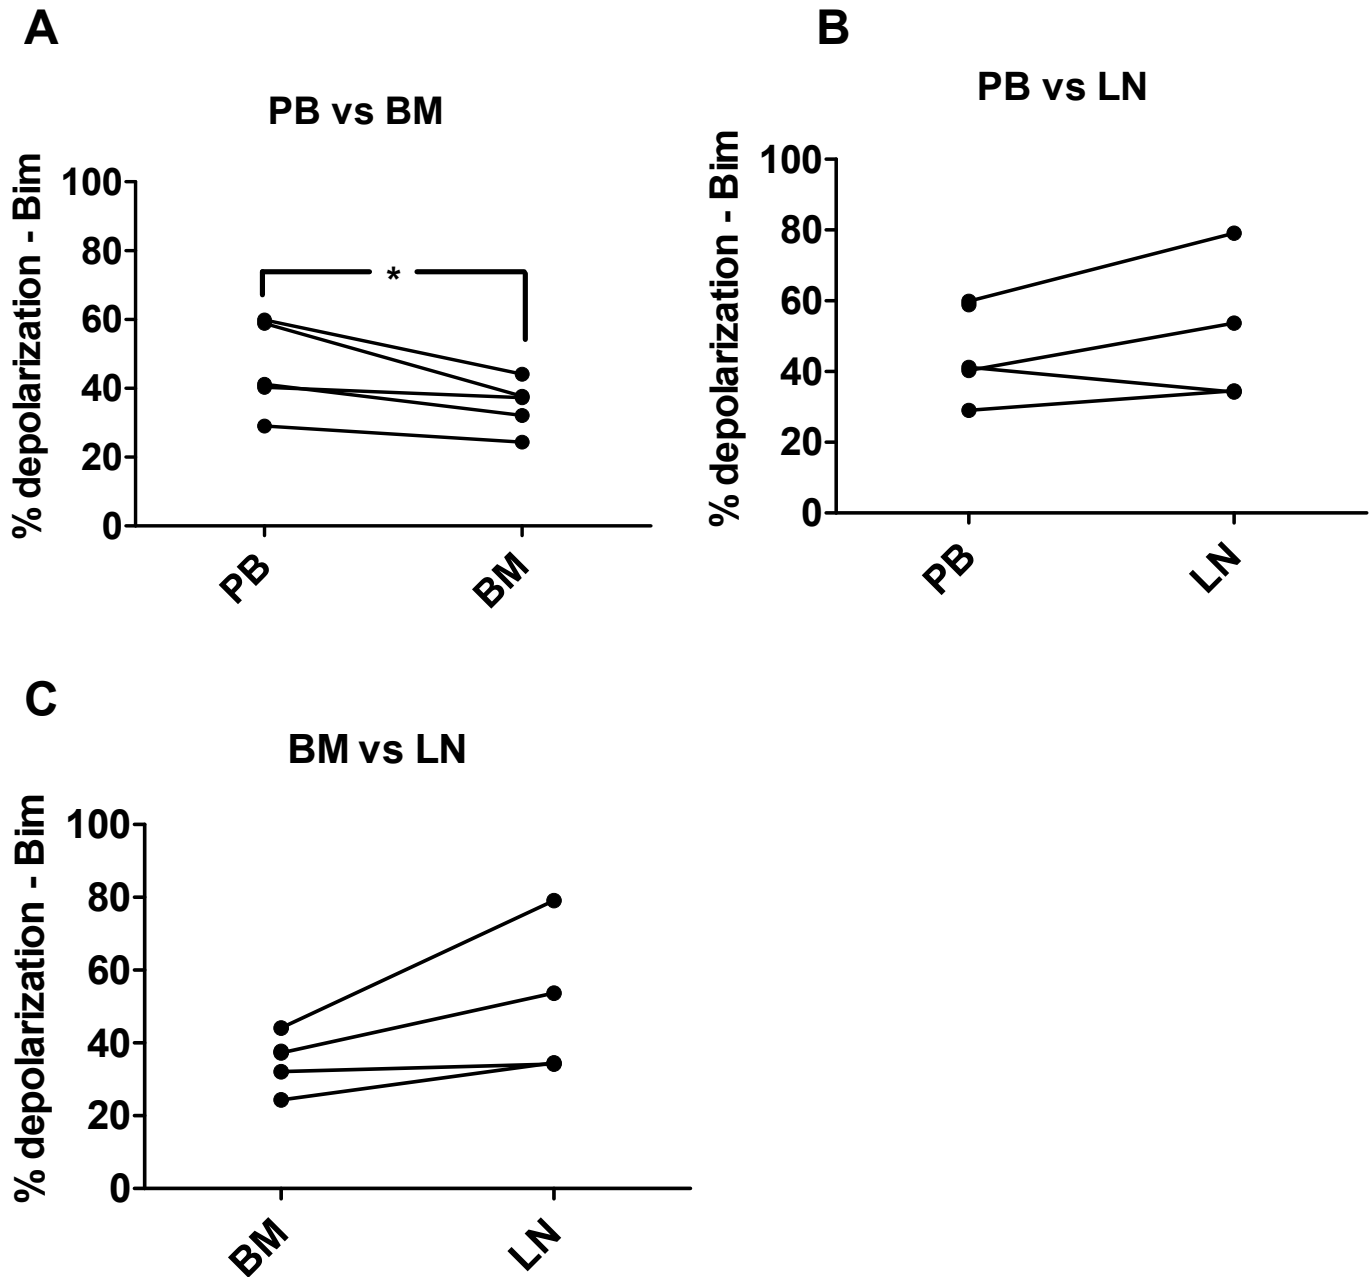

**Pairwise comparison of priming of CLL cells obtained from peripheral blood, lymph node and bone marrow compartments.** Comparison is made between samples obtained from different compartments from the same patients. A paired t-test provided the following two-tailed p values for each comparison: (A) 0.035; (B) 0.26; (C) 0.11.

**Supplemental Table 1**

| No. | Sex | Age | Rai Stage | Treatment status | WBC (k/mm <sup>3</sup> ) | B <sub>2</sub> M (mg/L) | IgG (mg/dL) | FISH cytogenetics      | %VH Homology | %ZAP70 | Therapy        | Clinical Response | %BIM depol. | %BAD depol. | %NOXA depol. | %HRK depol. |
|-----|-----|-----|-----------|------------------|--------------------------|-------------------------|-------------|------------------------|--------------|--------|----------------|-------------------|-------------|-------------|--------------|-------------|
| 1   | F   | 68  | 3         | Untreated        | 87.4                     | N/A                     | 260         | N/A                    | 96           | 2.9    | -              | -                 | 57.9        | 41.7        | 9.40         | 28.9        |
| 2   | M   | 67  | 4         | Untreated        | 254.4                    | 9.1                     | 1370        | del 13q                | 90.4         | 27.3   | LR             | PD                | 41.5        | 24.1        | 17.0         | 10.9        |
| 3   | F   | 70  | 1         | Untreated        | 36.8                     | 3.9                     | 413         | normal                 | N/A          | 1.34   | chlor/<br>pred | PR                | 75          | 51.1        | 21.8         | 21.5        |
| 4   | F   | 77  | 1         | Untreated        | 72.3                     | 3.1                     | 1270        | del 13q                | N/A          | 3.13   | -              | -                 | 61.7        | 39.6        | 28.6         | 33.3        |
| 5   | M   | 70  | 1         | Untreated        | 114.4                    | 3.3                     | 559         | del 13q                | 98.6         | 65.2   | -              | -                 | 68.9        | 44.6        | 24.9         | 21.7        |
| 6   | M   | 73  | 2         | Untreated        | 355.1                    | 4.8                     | 394         | del 13q                | 85           | 0.7    | -              | -                 | 15.3        | 29.2        | 22.7         | 7.47        |
| 7   | F   | 67  | 4         | s/p FR           | 101.5                    | 2.3                     | 543         | del 13q                | 93.3         | 0.79   | -              | -                 | 87.1        | 52.1        | 20.0         | 25.2        |
| 8   | F   | 63  | 1         | Untreated        | 207                      | 3                       | 991         | del 13q                | 100          | 66.8   | -              | -                 | 62.1        | 22.2        | 29.5         | 12.8        |
| 9   | M   | 66  | 3         | Untreated        | 247.1                    | 3.1                     | 687         | del 17p and<br>del 13q | 93.3         | 2.7    | -              | -                 | 44.9        | 17.9        | 28.8         | 22.4        |
| 10  | M   | 64  | 2         | s/p FR           | 86.6                     | 2.3                     | 293         | del 13q                | 94.7         | 16.6   | -              | -                 | 42.3        | 95.4        | 7.81         | 0           |
| 11  | F   | 76  | 2         | s/p F, FR        | 99.3                     | 5.5                     | 733         | del 11q and trisomy 12 | 100          | 12.6   | BR             | -                 | 60.4        | 48.7        | 23.6         | 36.8        |
| 12  | M   | 66  | 1         | Untreated        | 77.5                     | 1.9                     | 579         | del 13q and trisomy 12 | 91.4         | 46.9   | -              | -                 | 27.8        | 55.8        | 41.6         | 33.2        |
| 13  | M   | 63  | 2         | Untreated        | 203.3                    | N/A                     | N/A         | del 13q                | 97.2         | 45.6   | FR             | PD                | 60.3        | 38.4        | 39.3         | 22.2        |
| 14  | M   | 55  | 2         | Untreated        | 465.1                    | 3                       | 317         | del 11q and<br>del 13q | 100          | 10.8   | FCR            | PR                | 57.9        | 5.6         | 0            | -           |
| 15  | M   | 72  | 2         | Untreated        | 165.7                    | 3.6                     | 2610        | del 13q                | 90.6         | 6      | -              | -                 | 67.4        | 54.0        | 11.2         | 14.2        |
| 16  | F   | 66  | 1         | Untreated        | 71.7                     | 1.7                     | 423         | del 13q                | 94.2         | 1.3    | -              | -                 | 42          | 32.1        | 24.4         | 25.3        |
| 17  | M   | 62  | 1         | Untreated        | 60.2                     | 3.8                     | 327         | del 13q                | 97.2         | 8.9    | R/pred         | PR                | 68.2        | 51.2        | 19.7         | 23.8        |
| 18  | M   | 56  | 0         | Untreated        | 58.5                     | 1.8                     | 698         | del 13q                | 93.3         | 2.9    | -              | -                 | 23.7        | 54.2        | 24.6         | 25.3        |
| 19  | F   | 79  | 2         | Untreated        | 129.1                    | 4                       | 618         | del 13q and<br>del 17  | 95.4         | 0.6    | -              | -                 | 38.3        | 52.9        | 32.2         | 25.6        |
| 20  | F   | 65  | 2         | Untreated        | 151.7                    | 4.8                     | 240         | del 13q                | 89.1         | 0.3    | -              | -                 | 77.1        | 62.5        | 28.5         | 39.6        |
| 21  | F   | 54  | 2         | Untreated        | 270.8                    | N/A                     | 152         | del 13q                | 93           | 0.5    | -              | -                 | 87.4        | 56.1        | 37.9         | 37.9        |
| 22  | M   | 68  | 2         | R, O             | 16.1                     | 4.5                     | 807         | del 11q                | 100          | N/A    | -              | -                 | 94          | 12.8        | 6.22         | 4.97        |
| 23  | M   | 61  | 4         | s/p FCR, CHOP-R  | 85.9                     | 6.4                     | 668         | complex incl. del 17p  | 100          | 65.6   | -              | -                 | 80.4        | 47.3        | 24.4         | 24.7        |
| 24  | M   | 58  | 1         | Untreated        | 53.3                     | 2.7                     | 851         | del 17p                | 100          | 4.74   | FCR            | PR                | 90.5        | 16.1        | 28.0         | 0           |
| 25  | F   | 66  | 1         | Untreated        | 38.2                     | 3.8                     | 1180        | del 6q                 | 99.7         | 15.8   | LR             | CR                | 95.3        | 34.3        | 11.3         | 0.20        |
| 26  | M   | 51  | 0         | Untreated        | 81.4                     | 4.6                     | 805         | del 13q                | 99.5         | 5.43   | FCR            | CR                | 93.6        | 55.7        | 33.4         | 25.6        |
| 27  | F   | 58  | 1         | Untreated        | 71.6                     | 3.3                     | 837         | del 13q                | 96           | 0.28   | -              | -                 | 82          | 23.5        | 37.5         | 20.1        |
| 28  | F   | 77  | 1         | Untreated        | 44.5                     | 2.1                     | 785         | trisomy 12             | 100          | 51.8   | FR             | CR                | 83.6        | 61.1        | 0            | 15.4        |
| 29  | M   | 56  | 2         | Untreated        | 33.1                     | 6.4                     | 297         | trisomy 12             | 100          | 3.06   | FCR +<br>PCI   | -                 | 93.5        | 47.4        | 0            | 36.5        |
| 30  | F   | 53  | 0         | Untreated        | 69.4                     | 1.9                     | 1270        | del11q                 | N/A          | N/A    | FCR            | PD                | 6.1         | 23.5        | 0            | 0           |

**CLL patient characteristics.** Clinical characteristics of the 30 CLL patients studied (determined at time of sampling). % mitochondrial depolarization at 1 hour as assessed by BH3 profiling reveals that primary CLL cells are mainly BCL-2 dependent, with some patient samples showing relatively more reliance on other anti-apoptotic proteins such as MCL-1 and BCL-XL, as indicated by relatively higher levels of depolarization by NOXA and HRK peptides, respectively.

**Abbreviations:**

- *Clinical Response:* PD = progressive disease, PR = partial response, CR = complete response

*Therapy:* FR = fludarabine/rituximab, FCR = fludarabine/cyclophosphamide/rituximab, R = rituximab, O = ofatumumab, CHOP-R = cyclophosphamide/doxorubicin/vincristine/prednisone/rituximab, BR = bendamustine/rituximab, L = lenalidomide, PCI = PCI-32765, chlor = chlorambucil, pred = prednisone
